# Supplementary material
Source: ML conference proceedings conference paper supplement (https://proceedings.mlr.press/v80/janzing18a.html)
Supplement: Supplementary file [file janzing18a-supp.pdf]

---

# Supplement of “Detecting non-causal artifacts in multivariate linear regression models”

---

Dominik Janzing<sup>1</sup> Bernhard Schölkopf<sup>2</sup>

## 1. Proofs

### 1.1. Proof of Lemma 1

We first write  $\Phi$  as  $\Phi(v) = g(Av)Av$ , with  $g(w) := 1/\|w\|$ . Let  $t \mapsto s(t)$  be some curve on the unit sphere  $S^{d-1}$  and  $\tilde{s}(t) := \Phi(s(t))$  its image and assume  $v = s(0)$  and  $\tilde{v} = \tilde{s}(0)$ . Then we have

$$\begin{aligned} \frac{d}{dt}\Phi(s(t)) &= \langle \nabla g(As(t)), As'(t) \rangle As(t) \\ &\quad + g(As(t))As'(t), \end{aligned}$$

with  $\nabla g(w) = -w/\|w\|^3$ . Hence we obtain

$$\begin{aligned} \frac{d}{dt}\Phi(s(t)) & \tag{1} \\ &= \frac{-1}{\|As(t)\|^3} \langle As(t), As'(t) \rangle As(t) + g(As(t))As'(t) \\ &= g(As(t)) (As'(t) - \tilde{s}(t)\tilde{s}(t)^T As'(t)) \\ &= g(As(t)) (\mathbf{1} - \tilde{s}(t)\tilde{s}(t)^T) As'(t), \tag{2} \end{aligned}$$

where we have used  $\tilde{s}(t) = As(t)/\|As(t)\|$ . Note that the matrix  $\mathbf{1} - \tilde{s}(t)\tilde{s}(t)^T$  projects  $As'(t)$  onto the space orthogonal to  $\tilde{s}(t)$ , that is, the tangent space of the surface of the sphere at  $\tilde{s}(t)$ . Further, the matrix

$$g(As(t)) (\mathbf{1} - \tilde{s}(t)\tilde{s}(t)^T) A$$

maps each tangent vector  $s'(t)$  at  $s(t)$  (for any curve  $s$ ) to the corresponding tangent vector  $\tilde{s}'(t)$  at  $\tilde{s}(t)$ . It thus describes the Jacobian  $D\Phi$  mapping between tangent spaces  $T_{s(t)}$  and  $T_{\tilde{s}(t)}$  of the sphere at  $s(t)$  and  $\tilde{s}(t)$ , respectively. Let  $e_1, \dots, e_{d-1}$  and  $\tilde{e}_1, \dots, \tilde{e}_{d-1}$  be orthonormal bases of  $T_v$  and  $T_{\tilde{v}}$ , respectively (that is, bases of  $v^\perp$  and  $\tilde{v}^\perp$ , respectively). If we set  $U_v := (e_1, \dots, e_{d-1})$  and  $U_{\tilde{v}} := (\tilde{e}_1, \dots, \tilde{e}_{d-1})$ , the matrix representation of the Jacobian  $D\Phi$  with respect to these bases reads

$$\widehat{D\Phi}(v) := g(Av)U_v^T AU_v.$$

---

<sup>1</sup>Amazon Development Center, Tübingen, Germany <sup>2</sup>Max Planck Institute for Intelligent Systems, Tübingen, Germany. This work has been done at the MPI before DJ joined Amazon. Correspondence to: Dominik Janzing <janzind@amazon.com>.

We then have

$$\det \widehat{D\Phi}(v) = g(Av)^{d-1} \det(U_v^T AU_v).$$

For later use, we also observe that multiplying the equation  $\tilde{v} = Av/\|Av\|$  with  $A^{-1}$  and taking the norm on both sides yields

$$1/\|Av\| = \|A^{-1}\tilde{v}\|. \tag{3}$$

For the probability density we thus obtain

$$\begin{aligned} p(\tilde{v}) &= |\det \widehat{D\Phi}(\Phi^{-1}(\tilde{v}))|^{-1} \\ &= (\|A^{-1}\tilde{v}\|^{d-1} |\det(U_v^T AU_v)|)^{-1} \\ &= \left( \|A^{-1}\tilde{v}\|^{d-1} |\det(\tilde{A})| \right)^{-1}, \tag{4} \end{aligned}$$

with the abbreviation  $\tilde{A} := U_v^T AU_v$ . Let us now define the orthogonal  $d \times d$  matrices

$$W_v := (U_v, v) \quad \text{and} \quad (U_{\tilde{v}}, \tilde{v}).$$

Then we define  $A' := W_v^T AW_v$ , which implies  $|\det(A')| = |\det(A)|$ .  $A'$  can be written as

$$A' = \begin{pmatrix} \tilde{A} & 0 \\ w & \|Av\| \end{pmatrix},$$

where  $w$  is some  $1 \times (d-1)$ -matrix. Hence we obtain

$$\det(A') = \det(\tilde{A})\|Av\| = \frac{\det(\tilde{A})}{\|A^{-1}\tilde{v}\|},$$

where we have used also (3). We can thus rewrite (4) as

$$p(\tilde{v}) = \frac{1}{|\det(A)| \|A^{-1}\tilde{v}\|^d}.$$

### 1.2. Proof of Theorem 3

By definition,  $p_{\theta'}$  is obtained by applying the map  $\sqrt{R_{\theta'}}$  to vectors drawn from a rotation invariant distribution with renormalizing it later. Without loss of generality, let all the matrices  $R_{\theta}$  be diagonal with eigenvalues  $f_j(\theta)$  (note that they commute). Let  $v$  be generated by drawing each entry  $v_j$  from  $\mathcal{N}(0, 1)$ . We can then compute the entries of  $\tilde{v}$  by

$$\tilde{v}_j := \frac{1}{\sum_{i=1}^d f_j(\theta') v_i^2} \sqrt{f_j(\theta')} v_j.$$

Rewriting (10) in terms of  $v_j$  instead of  $\tilde{v}$  yields

$$\begin{aligned} \log p_\theta(\tilde{v}) &= -\frac{1}{2} \left\{ \log \frac{1}{d} \sum_{j=1}^d f_j(\theta') f_j(\theta)^{-1} v_j^2 \right. \\ &\quad \left. - \log \frac{1}{d} \sum_{j=1}^d f_j(\theta') v_j^2 \right\} + \frac{1}{2} \log \det R_\theta. \end{aligned}$$

Since each  $v_j^2$  is an independent squared standard Gaussian it has expectation 1 and variance 2. Therefore, the random variable

$$\frac{1}{d} \sum_{j=1}^d f_j(\theta') f_j(\theta)^{-1} v_j^2$$

has mean  $\tau(R_\theta R_{\theta'}^{-1})$  and variance

$$\frac{2}{d^2} \sum_{j=1}^d f_j(\theta')^2 f_j(\theta)^{-2}.$$

Due to Chebychev's inequality we have

$$\left| \frac{1}{d} \sum_{j=1}^d f_j(\theta') f_j(\theta)^{-1} v_j^2 - \tau(R_\theta R_{\theta'}^{-1}) \right| \leq \delta,$$

with probability  $1 - \frac{2}{d^2} \sum_{j=1}^d f_j(\theta')^2 f_j(\theta)^{-2} / \delta^2 = 1 - \frac{2}{d} \tau(R_{\theta'}^2 R_\theta^{-2}) / \delta^2$ . Likewise,

$$\left| \frac{1}{d} \sum_{j=1}^d f_j(\theta') v_j^2 - \tau(R_{\theta'}) \right| \leq \delta,$$

with probability  $1 - \frac{2}{d} \tau(R_{\theta'}^2) / \delta^2$ . Since  $|\log(x + \rho) - \log x| \leq 2\rho/x$  for sufficiently small  $\rho$ , we can ensure that

$$\left| \log \frac{1}{d} \sum_{j=1}^d f_j(\theta') f_j(\theta)^{-1} v_j^2 - \log \tau(R_\theta R_{\theta'}^{-1}) \right| \leq \epsilon, \quad (5)$$

by choosing  $\delta \leq \epsilon / (2\tau(R_\theta R_{\theta'}^{-1}))$ . Likewise, we can achieve that

$$\left| \log \frac{1}{d} \sum_{j=1}^d f_j(\theta') v_j^2 - \log \tau(R_{\theta'}) \right| \leq \epsilon, \quad (6)$$

if  $\delta \leq \epsilon / (2\tau(R_{\theta'}))$ . Thus, both inequalities (5) and (6) together hold with probability at least

$$1 - \frac{8}{d\epsilon^2} [\tau(R_{\theta'}^2 R_\theta^{-2}) \tau(R_\theta R_{\theta'}^{-1})^2 + \tau(R_{\theta'}^2) \tau(R_{\theta'})^2].$$
